# Supplementary material
Source: HighWire-hosted journal article supplement (https://openres.ersjournals.com/content/7/3/00178-2021)
Supplement: inline-supplementary-material-1 [file inline-supplementary-material-1.pdf]

**Appendix A. Results of competing risk regression analysis for the effects of covariates.**

**Table A.1.** Results of cause-specific and Fine-Gray sub-distribution hazard models representing hazard ratio of the event of interest for every % increase in percent predicted forced expiratory volume in 1 second.

| Parameter                                                    | Reference                                                    | <i>Diabetes cause-specific hazard</i> |        |       |         | <i>Diabetes sub-distribution hazard</i> |        |       |         |
|--------------------------------------------------------------|--------------------------------------------------------------|---------------------------------------|--------|-------|---------|-----------------------------------------|--------|-------|---------|
|                                                              |                                                              | Hazard ratio                          | 95% CI |       | P-value | Hazard ratio                            | 95% CI |       | P-value |
| Age: 35-44 years                                             | Age: 25-34 years                                             | 1.81                                  | 0.61   | 5.37  | 0.29    | 1.79                                    | 0.60   | 5.28  | 0.29    |
| Age: 45-54 years                                             |                                                              | 2.35                                  | 0.85   | 6.47  | 0.10    | 2.24                                    | 0.78   | 6.42  | 0.14    |
| Age: 55-64 years                                             |                                                              | 4.15                                  | 1.53   | 11.26 | <0.01   | 3.90                                    | 1.41   | 10.79 | 0.01    |
| Age: 65-74 years                                             |                                                              | 3.53                                  | 1.16   | 10.74 | 0.03    | 3.19                                    | 0.98   | 10.31 | 0.05    |
| Body Mass Index (kg/m <sup>2</sup> )                         |                                                              | 1.46                                  | 0.97   | 2.22  | 0.07    | 1.49                                    | 1.07   | 2.07  | 0.02    |
| (Body Mass Index) <sup>2</sup>                               |                                                              | 1.00                                  | 0.99   | 1.00  | 0.25    | 1.00                                    | 0.99   | 1.00  | 0.09    |
| Percent Predicted Forced Expiratory Volume                   |                                                              | 0.98                                  | 0.96   | 0.99  | <0.01   | 0.98                                    | 0.96   | 0.99  | 0.02    |
| Sex: Female                                                  | Male                                                         | 0.47                                  | 0.25   | 0.88  | 0.02    | 0.47                                    | 0.24   | 0.91  | 0.02    |
| Race: White                                                  | Race: Black                                                  | 1.87                                  | 0.53   | 6.67  | 0.33    | 1.78                                    | 0.48   | 6.55  | 0.39    |
| Education: less than high school                             | Education: at least high school                              | 1.25                                  | 0.65   | 2.41  | 0.50    | 1.22                                    | 0.62   | 2.40  | 0.56    |
| Smoking status: Ever Smoker                                  | Smoking status: Never smoker                                 | 0.70                                  | 0.38   | 1.29  | 0.25    | 0.70                                    | 0.38   | 1.29  | 0.26    |
| Physically Inactive                                          | Active                                                       | 0.23                                  | 0.03   | 1.67  | 0.15    | 0.22                                    | 0.03   | 1.68  | 0.15    |
| Marital status: Currently married                            | Marital status: Not currently married                        | 1.50                                  | 0.63   | 3.58  | 0.36    | 1.46                                    | 0.63   | 3.38  | 0.38    |
| Alcohol consumption: More than 4 alcoholic drinks in a month | Alcohol consumption: Less than 4 alcoholic drinks in a month | 0.96                                  | 0.52   | 1.77  | 0.89    | 0.97                                    | 0.53   | 1.76  | 0.91    |
| FEV1/FVC<0.7                                                 |                                                              | 0.73                                  | 0.32   | 1.67  | 0.45    | 0.71                                    | 0.31   | 1.66  | 0.43    |
| Charlson's comorbidity index score                           |                                                              | 0.77                                  | 0.25   | 2.35  | 0.65    | 0.71                                    | 0.27   | 1.86  | 0.49    |
| Parameter                                                    | Reference                                                    | <i>Asthma cause-specific hazard</i>   |        |       |         | <i>Asthma sub-distribution hazard</i>   |        |       |         |
|                                                              |                                                              | Hazard ratio                          | 95% CI |       | P-value | Hazard ratio                            | 95% CI |       | P-value |
| Age: 35-44 years                                             | Age: 25-34 years                                             | 0.39                                  | 0.08   | 1.94  | 0.25    | 0.39                                    | 0.07   | 2.00  | 0.26    |
| Age: 45-54 years                                             |                                                              | 1.28                                  | 0.43   | 3.83  | 0.66    | 1.24                                    | 0.47   | 3.30  | 0.67    |
| Age: 55-64 years                                             |                                                              | 1.29                                  | 0.37   | 4.43  | 0.69    | 1.17                                    | 0.39   | 3.49  | 0.78    |
| Age: 65-74 years                                             |                                                              | 1.28                                  | 0.30   | 5.39  | 0.74    | 1.11                                    | 0.26   | 4.72  | 0.88    |
| Body Mass Index (kg/m <sup>2</sup> )                         |                                                              | 1.29                                  | 0.64   | 2.59  | 0.48    | 1.33                                    | 0.75   | 2.34  | 0.33    |
| (Body Mass Index) <sup>2</sup>                               |                                                              | 1.00                                  | 0.98   | 1.01  | 0.56    | 1.00                                    | 0.99   | 1.01  | 0.34    |
| Percent Predicted Forced Expiratory Volume                   |                                                              | 0.96                                  | 0.93   | 0.98  | <0.01   | 0.96                                    | 0.94   | 0.98  | <0.01   |
| Sex: Female                                                  | Male                                                         | 2.83                                  | 1.11   | 7.22  | 0.03    | 2.94                                    | 1.25   | 6.93  | 0.01    |
| Race: White                                                  | Race: Black                                                  | 1.55                                  | 0.20   | 12.01 | 0.67    | 1.57                                    | 0.21   | 12.05 | 0.66    |
| Education: less than high school                             | Education: at least high school                              | 0.35                                  | 0.09   | 1.40  | 0.14    | 0.34                                    | 0.08   | 1.42  | 0.14    |
| Smoking status: Ever Smoker                                  | Smoking status: Never smoker                                 | 1.25                                  | 0.53   | 2.96  | 0.61    | 1.28                                    | 0.59   | 2.80  | 0.53    |
| Physically Inactive                                          | Active                                                       | 2.37                                  | 0.76   | 7.40  | 0.14    | 2.24                                    | 0.76   | 6.65  | 0.15    |
| Marital status: Currently married                            | Marital status: Not currently married                        | 1.18                                  | 0.43   | 3.25  | 0.75    | 1.15                                    | 0.44   | 3.02  | 0.78    |
| Alcohol consumption: More than 4 alcoholic drinks in a month | Alcohol consumption: Less than 4 alcoholic drinks in a month | 0.42                                  | 0.14   | 1.26  | 0.12    | 0.42                                    | 0.15   | 1.22  | 0.11    |
| FEV1/FVC<0.7                                                 |                                                              | 1.93                                  | 0.71   | 5.25  | 0.20    | 1.92                                    | 0.73   | 5.04  | 0.18    |
| Charlson's comorbidity index score                           |                                                              | 1.28                                  | 0.43   | 3.83  | 0.66    | 1.17                                    | 0.58   | 2.37  | 0.66    |

**Table A.1. continued** Results of cause-specific and Fine-Gray sub-distribution hazard models representing hazard ratio of the event of interest for every % increase in percent predicted forced expiratory volume in 1 second.

|                                                              |                                                              | <b>Heart attack/Myocardial Infarction cause-specific hazard</b> |        |        |         | <b>Heart attack/Myocardial Infarction sub-distribution hazard</b> |        |        |         |
|--------------------------------------------------------------|--------------------------------------------------------------|-----------------------------------------------------------------|--------|--------|---------|-------------------------------------------------------------------|--------|--------|---------|
| Parameter                                                    | Reference                                                    | Hazard ratio                                                    | 95% CI |        | P-value | Hazard ratio                                                      | 95% CI |        | P-value |
| Age: 35-44 years                                             | Age: 25-34 years                                             | 3.84                                                            | 0.39   | 37.66  | 0.25    | 3.75                                                              | 0.38   | 37.39  | 0.26    |
| Age: 45-54 years                                             |                                                              | 15.41                                                           | 2.00   | 118.75 | <0.01   | 14.98                                                             | 1.92   | 116.86 | <0.01   |
| Age: 55-64 years                                             |                                                              | 36.09                                                           | 4.78   | 272.40 | <0.01   | 33.63                                                             | 4.33   | 261.44 | <0.01   |
| Age: 65-74 years                                             |                                                              | 45.71                                                           | 5.93   | 352.43 | <0.01   | 40.84                                                             | 4.98   | 335.13 | <0.01   |
| Body Mass Index (kg/m <sup>2</sup> )                         |                                                              | 1.17                                                            | 0.70   | 1.94   | 0.56    | 1.19                                                              | 0.71   | 1.99   | 0.51    |
| (Body Mass Index) <sup>2</sup>                               |                                                              | 1.00                                                            | 0.99   | 1.01   | 0.67    | 1.00                                                              | 0.99   | 1.01   | 0.59    |
| Percent Predicted Forced Expiratory Volume                   |                                                              | 0.99                                                            | 0.97   | 1.00   | 0.12    | 0.99                                                              | 0.98   | 1.00   | 0.10    |
| Sex: Female                                                  | Male                                                         | 0.36                                                            | 0.18   | 0.72   | <0.01   | 0.37                                                              | 0.19   | 0.71   | <0.01   |
| Race: White                                                  | Race: Black                                                  | 2.40                                                            | 0.54   | 10.71  | 0.25    | 2.33                                                              | 0.52   | 10.48  | 0.27    |
| Education: less than high school                             | Education: at least high school                              | 1.17                                                            | 0.63   | 2.16   | 0.62    | 1.15                                                              | 0.59   | 2.22   | 0.68    |
| Smoking status: Ever Smoker                                  | Smoking status: Never smoker                                 | 1.80                                                            | 0.90   | 3.58   | 0.10    | 1.82                                                              | 0.90   | 3.66   | 0.09    |
| Physically Inactive                                          | Active                                                       | 0.67                                                            | 0.21   | 2.19   | 0.51    | 0.64                                                              | 0.20   | 2.04   | 0.45    |
| Marital status: Currently married                            | Marital status: Not currently married                        | 0.71                                                            | 0.36   | 1.39   | 0.31    | 0.68                                                              | 0.35   | 1.31   | 0.25    |
| Alcohol consumption: More than 4 alcoholic drinks in a month | Alcohol consumption: Less than 4 alcoholic drinks in a month | 0.95                                                            | 0.53   | 1.72   | 0.87    | 0.95                                                              | 0.52   | 1.76   | 0.87    |
| FEV1/FVC<0.7                                                 |                                                              | 0.63                                                            | 0.30   | 1.33   | 0.23    | 0.63                                                              | 0.32   | 1.24   | 0.18    |
| Charlson's comorbidity index score                           |                                                              | 1.29                                                            | 0.67   | 2.47   | 0.45    | 1.17                                                              | 0.63   | 2.15   | 0.62    |
|                                                              |                                                              | <b>Hypertension cause-specific hazard</b>                       |        |        |         | <b>Hypertension sub-distribution hazard</b>                       |        |        |         |
| Parameter                                                    | Reference                                                    | Hazard ratio                                                    | 95% CI |        | P-value | Hazard ratio                                                      | 95% CI |        | P-value |
| Age: 35-44 years                                             | Age: 25-34 years                                             | 1.55                                                            | 1.13   | 2.14   | <0.01   | 1.54                                                              | 1.13   | 2.11   | <0.01   |
| Age: 45-54 years                                             |                                                              | 1.85                                                            | 1.36   | 2.53   | <0.01   | 1.81                                                              | 1.33   | 2.47   | <0.01   |
| Age: 55-64 years                                             |                                                              | 1.94                                                            | 1.38   | 2.73   | <0.01   | 1.82                                                              | 1.29   | 2.57   | <0.01   |
| Age: 65-74 years                                             |                                                              | 2.06                                                            | 1.40   | 3.03   | <0.01   | 1.86                                                              | 1.26   | 2.76   | <0.01   |
| Body Mass Index (kg/m <sup>2</sup> )                         |                                                              | 1.20                                                            | 1.05   | 1.37   | <0.01   | 1.22                                                              | 1.07   | 1.38   | <0.01   |
| (Body Mass Index) <sup>2</sup>                               |                                                              | 1.00                                                            | 1.00   | 1.00   | 0.15    | 1.00                                                              | 1.00   | 1.00   | 0.07    |
| Percent Predicted Forced Expiratory Volume                   |                                                              | 1.00                                                            | 0.99   | 1.01   | 0.66    | 1.00                                                              | 0.99   | 1.01   | 0.99    |
| Sex: Female                                                  | Male                                                         | 1.16                                                            | 0.93   | 1.45   | 0.18    | 1.19                                                              | 0.95   | 1.48   | 0.13    |
| Race: White                                                  | Race: Black                                                  | 0.78                                                            | 0.55   | 1.10   | 0.15    | 0.76                                                              | 0.53   | 1.08   | 0.13    |
| Education: less than high school                             | Education: at least high school                              | 1.07                                                            | 0.82   | 1.41   | 0.62    | 1.04                                                              | 0.79   | 1.38   | 0.78    |
| Smoking status: Ever Smoker                                  | Smoking status: Never smoker                                 | 1.08                                                            | 0.87   | 1.35   | 0.50    | 1.09                                                              | 0.87   | 1.36   | 0.48    |
| Physically Inactive                                          | Active                                                       | 1.11                                                            | 0.78   | 1.60   | 0.56    | 1.12                                                              | 0.78   | 1.61   | 0.55    |
| Marital status: Currently married                            | Marital status: Not currently married                        | 1.09                                                            | 0.83   | 1.43   | 0.56    | 1.07                                                              | 0.81   | 1.40   | 0.64    |
| Alcohol consumption: More than 4 alcoholic drinks in a month | Alcohol consumption: Less than 4 alcoholic drinks in a month | 1.05                                                            | 0.83   | 1.32   | 0.70    | 1.05                                                              | 0.84   | 1.32   | 0.67    |
| FEV1/FVC<0.7                                                 |                                                              | 1.08                                                            | 0.80   | 1.48   | 0.61    | 1.07                                                              | 0.79   | 1.46   | 0.65    |
| Charlson's comorbidity index score                           |                                                              | 1.49                                                            | 1.22   | 1.83   | <0.01   | 1.37                                                              | 1.12   | 1.68   | <0.01   |

**Table A.1. continued** Results of cause-specific and Fine-Gray sub-distribution hazard models representing hazard ratio of the event of interest for every % increase in percent predicted forced expiratory volume in 1 second.

| Parameter                                                    | Reference                                                    | <i>All-cause mortality cause-specific hazard</i> |        |       |         | <i>All-cause mortality sub-distribution hazard</i> |        |       |         |
|--------------------------------------------------------------|--------------------------------------------------------------|--------------------------------------------------|--------|-------|---------|----------------------------------------------------|--------|-------|---------|
|                                                              |                                                              | Hazard ratio                                     | 95% CI |       | P-value | Hazard ratio                                       | 95% CI |       | P-value |
| Age: 35-44 years                                             | Age: 25-34 years                                             | 1.36                                             | 0.59   | 3.10  | 0.47    | 1.31                                               | 0.57   | 3.03  | 0.52    |
| Age: 45-54 years                                             |                                                              | 1.74                                             | 0.81   | 3.76  | 0.16    | 1.68                                               | 0.79   | 3.56  | 0.18    |
| Age: 55-64 years                                             |                                                              | 3.74                                             | 1.82   | 7.70  | <0.01   | 3.52                                               | 1.73   | 7.17  | <0.01   |
| Age: 65-74 years                                             |                                                              | 11.06                                            | 5.51   | 22.21 | <0.01   | 10.21                                              | 5.13   | 20.34 | <0.01   |
| Body Mass Index (kg/m <sup>2</sup> )                         |                                                              | 0.80                                             | 0.65   | 0.99  | 0.04    | 0.81                                               | 0.62   | 1.05  | 0.11    |
| (Body Mass Index) <sup>2</sup>                               |                                                              | 1.00                                             | 1.00   | 1.01  | 0.02    | 1.00                                               | 1.00   | 1.01  | 0.08    |
| Percent Predicted Forced Expiratory Volume                   |                                                              | 0.98                                             | 0.97   | 0.99  | <0.01   | 0.98                                               | 0.97   | 0.99  | <0.01   |
| Sex: Female                                                  | Male                                                         | 0.53                                             | 0.35   | 0.82  | <0.01   | 0.54                                               | 0.36   | 0.82  | <0.01   |
| Race: White                                                  | Race: Black                                                  | 2.31                                             | 0.94   | 5.64  | 0.07    | 2.20                                               | 0.96   | 5.04  | 0.06    |
| Education: less than high school                             | Education: at least high school                              | 1.22                                             | 0.81   | 1.85  | 0.35    | 1.23                                               | 0.81   | 1.85  | 0.34    |
| Smoking status: Ever Smoker                                  | Smoking status: Never smoker                                 | 0.74                                             | 0.49   | 1.13  | 0.16    | 0.74                                               | 0.49   | 1.12  | 0.16    |
| Physically Inactive                                          | Active                                                       | 1.33                                             | 0.74   | 2.39  | 0.34    | 1.26                                               | 0.71   | 2.23  | 0.43    |
| Marital status: Currently married                            | Marital status: Not currently married                        | 0.89                                             | 0.57   | 1.39  | 0.60    | 0.86                                               | 0.54   | 1.38  | 0.54    |
| Alcohol consumption: More than 4 alcoholic drinks in a month | Alcohol consumption: Less than 4 alcoholic drinks in a month | 1.32                                             | 0.89   | 1.94  | 0.17    | 1.35                                               | 0.91   | 2.00  | 0.13    |
| FEV1/FVC<0.7                                                 |                                                              | 1.23                                             | 0.76   | 1.98  | 0.40    | 1.23                                               | 0.74   | 2.04  | 0.43    |
| Charlson's comorbidity index score                           |                                                              | 1.67                                             | 1.25   | 2.22  | <0.01   | 1.55                                               | 1.11   | 2.17  | 0.01    |

**Appendix B. Results of competing risk regression analysis for the effects of covariates.**

**Table B.1.** Results of cause-specific and Fine-Gray sub-distribution hazard models representing hazard ratio of the event of interest for every liter increase in absolute forced expiratory volume in 1 second.

| Parameter                                                    | Reference                                                    | <i>Diabetes cause-specific hazard</i> |        |       |         | <i>Diabetes sub-distribution hazard</i> |        |       |         |
|--------------------------------------------------------------|--------------------------------------------------------------|---------------------------------------|--------|-------|---------|-----------------------------------------|--------|-------|---------|
|                                                              |                                                              | Hazard ratio                          | 95% CI |       | P-value | Hazard ratio                            | 95% CI |       | P-value |
| Age: 35-44 years                                             | Age: 25-34 years                                             | 1.54                                  | 0.51   | 4.60  | 0.44    | 1.53                                    | 0.51   | 4.59  | 0.45    |
| Age: 45-54 years                                             |                                                              | 1.60                                  | 0.56   | 4.58  | 0.38    | 1.55                                    | 0.50   | 4.79  | 0.45    |
| Age: 55-64 years                                             |                                                              | 2.25                                  | 0.76   | 6.68  | 0.14    | 2.18                                    | 0.67   | 7.16  | 0.20    |
| Age: 65-74 years                                             |                                                              | 1.50                                  | 0.43   | 5.30  | 0.53    | 1.42                                    | 0.35   | 5.82  | 0.63    |
| Body Mass Index (kg/m <sup>2</sup> )                         |                                                              | 1.45                                  | 0.95   | 2.21  | 0.09    | 1.46                                    | 1.03   | 2.07  | 0.03    |
| (Body Mass Index) <sup>2</sup>                               |                                                              | 1.00                                  | 0.99   | 1.00  | 0.28    | 1.00                                    | 0.99   | 1.00  | 0.14    |
| Forced Expiratory Volume in 1 second (FEV1)(liter)           |                                                              | 0.45                                  | 0.27   | 0.76  | <0.01   | 0.47                                    | 0.27   | 0.82  | <0.01   |
| Sex: Female                                                  | Male                                                         | 0.24                                  | 0.11   | 0.52  | <0.01   | 0.25                                    | 0.11   | 0.56  | <0.01   |
| Race: White                                                  | Race: Black                                                  | 2.56                                  | 0.72   | 9.14  | 0.15    | 2.38                                    | 0.64   | 8.83  | 0.20    |
| Education: less than high school                             | Education: at least high school                              | 1.21                                  | 0.63   | 2.32  | 0.57    | 1.19                                    | 0.61   | 2.30  | 0.61    |
| Smoking status: Ever Smoker                                  | Smoking status: Never smoker                                 | 0.71                                  | 0.39   | 1.31  | 0.28    | 0.71                                    | 0.38   | 1.32  | 0.28    |
| Physically Inactive                                          | Active                                                       | 0.22                                  | 0.03   | 1.62  | 0.14    | 0.22                                    | 0.03   | 1.62  | 0.14    |
| Marital status: Currently married                            | Marital status: Not currently married                        | 1.51                                  | 0.63   | 3.60  | 0.35    | 1.47                                    | 0.64   | 3.42  | 0.37    |
| Alcohol consumption: More than 4 alcoholic drinks in a month | Alcohol consumption: Less than 4 alcoholic drinks in a month | 0.96                                  | 0.52   | 1.77  | 0.89    | 0.97                                    | 0.53   | 1.78  | 0.92    |
| FEV1/FVC<0.7                                                 |                                                              | 0.73                                  | 0.33   | 1.65  | 0.45    | 0.71                                    | 0.30   | 1.66  | 0.43    |
| Charlson's comorbidity index score                           |                                                              | 0.77                                  | 0.25   | 2.36  | 0.65    | 0.72                                    | 0.28   | 1.89  | 0.51    |
| Parameter                                                    | Reference                                                    | <i>Asthma cause-specific hazard</i>   |        |       |         | <i>Asthma sub-distribution hazard</i>   |        |       |         |
|                                                              |                                                              | Hazard ratio                          | 95% CI |       | P-value | Hazard ratio                            | 95% CI |       | P-value |
| Age: 35-44 years                                             | Age: 25-34 years                                             | 0.30                                  | 0.06   | 1.51  | 0.14    | 0.30                                    | 0.06   | 1.66  | 0.17    |
| Age: 45-54 years                                             |                                                              | 0.68                                  | 0.21   | 2.19  | 0.52    | 0.69                                    | 0.25   | 1.88  | 0.46    |
| Age: 55-64 years                                             |                                                              | 0.48                                  | 0.12   | 1.89  | 0.29    | 0.46                                    | 0.14   | 1.46  | 0.19    |
| Age: 65-74 years                                             |                                                              | 0.32                                  | 0.06   | 1.71  | 0.18    | 0.30                                    | 0.06   | 1.45  | 0.14    |
| Body Mass Index (kg/m <sup>2</sup> )                         |                                                              | 1.25                                  | 0.62   | 2.51  | 0.54    | 1.28                                    | 0.72   | 2.30  | 0.40    |
| (Body Mass Index) <sup>2</sup>                               |                                                              | 1.00                                  | 0.98   | 1.01  | 0.61    | 1.00                                    | 0.99   | 1.01  | 0.42    |
| Forced Expiratory Volume in 1 second (FEV1)(liter)           |                                                              | 0.21                                  | 0.10   | 0.47  | <0.01   | 0.24                                    | 0.12   | 0.46  | <0.01   |
| Sex: Female                                                  | Male                                                         | 0.90                                  | 0.31   | 2.62  | 0.84    | 1.00                                    | 0.37   | 2.69  | 1.00    |
| Race: White                                                  | Race: Black                                                  | 2.66                                  | 0.35   | 20.39 | 0.35    | 2.58                                    | 0.36   | 18.53 | 0.35    |
| Education: less than high school                             | Education: at least high school                              | 0.33                                  | 0.08   | 1.29  | 0.11    | 0.32                                    | 0.08   | 1.31  | 0.11    |
| Smoking status: Ever Smoker                                  | Smoking status: Never smoker                                 | 1.25                                  | 0.53   | 2.97  | 0.61    | 1.28                                    | 0.58   | 2.82  | 0.53    |
| Physically Inactive                                          | Active                                                       | 2.36                                  | 0.76   | 7.37  | 0.14    | 2.21                                    | 0.75   | 6.53  | 0.15    |
| Marital status: Currently married                            | Marital status: Not currently married                        | 1.11                                  | 0.41   | 3.06  | 0.83    | 1.08                                    | 0.42   | 2.77  | 0.88    |
| Alcohol consumption: More than 4 alcoholic drinks in a month | Alcohol consumption: Less than 4 alcoholic drinks in a month | 0.44                                  | 0.15   | 1.30  | 0.14    | 0.44                                    | 0.15   | 1.27  | 0.13    |
| FEV1/FVC<0.7                                                 |                                                              | 1.92                                  | 0.71   | 5.17  | 0.20    | 1.90                                    | 0.73   | 4.97  | 0.19    |
| Charlson's comorbidity index score                           |                                                              | 1.30                                  | 0.42   | 3.97  | 0.65    | 1.20                                    | 0.60   | 2.40  | 0.61    |

**Table B.1 continued.** Results of cause-specific and Fine-Gray sub-distribution hazard models representing hazard ratio of the event of interest for every liter increase in absolute forced expiratory volume in 1 second.

| Parameter                                                    | Reference                                                    | <i>Heart attack/ Myocardial Infarction cause-specific hazard</i> |        |        |         | <i>Heart attack/ Myocardial Infarction sub-distribution hazard</i> |        |        |         |
|--------------------------------------------------------------|--------------------------------------------------------------|------------------------------------------------------------------|--------|--------|---------|--------------------------------------------------------------------|--------|--------|---------|
|                                                              |                                                              | Hazard ratio                                                     | 95% CI |        | P-value | Hazard ratio                                                       | 95% CI |        | P-value |
| Age: 35-44 years                                             | Age: 25-34 years                                             | 3.41                                                             | 0.35   | 33.52  | 0.29    | 3.38                                                               | 0.34   | 33.55  | 0.30    |
| Age: 45-54 years                                             |                                                              | 11.66                                                            | 1.48   | 91.96  | 0.02    | 11.78                                                              | 1.54   | 89.98  | 0.02    |
| Age: 55-64 years                                             |                                                              | 23.58                                                            | 2.97   | 187.05 | <0.01   | 23.23                                                              | 3.08   | 175.34 | <0.01   |
| Age: 65-74 years                                             |                                                              | 25.09                                                            | 2.97   | 211.66 | <0.01   | 24.26                                                              | 2.96   | 198.97 | <0.01   |
| Body Mass Index (kg/m <sup>2</sup> )                         |                                                              | 1.16                                                             | 0.69   | 1.95   | 0.57    | 1.19                                                               | 0.70   | 2.02   | 0.52    |
| (Body Mass Index) <sup>2</sup>                               |                                                              | 1.00                                                             | 0.99   | 1.01   | 0.68    | 1.00                                                               | 0.99   | 1.01   | 0.60    |
| Forced Expiratory Volume in 1 second (FEV1)(liter)           |                                                              | 0.60                                                             | 0.37   | 0.98   | 0.04    | 0.65                                                               | 0.44   | 0.94   | 0.02    |
| Sex: Female                                                  | Male                                                         | 0.24                                                             | 0.11   | 0.54   | <0.01   | 0.26                                                               | 0.13   | 0.53   | <0.01   |
| Race: White                                                  | Race: Black                                                  | 2.85                                                             | 0.64   | 12.75  | 0.17    | 2.70                                                               | 0.59   | 12.27  | 0.20    |
| Education: less than high school                             | Education: at least high school                              | 1.14                                                             | 0.61   | 2.11   | 0.68    | 1.13                                                               | 0.59   | 2.16   | 0.72    |
| Smoking status: Ever Smoker                                  | Smoking status: Never smoker                                 | 1.81                                                             | 0.91   | 3.61   | 0.09    | 1.82                                                               | 0.91   | 3.64   | 0.09    |
| Physically Inactive                                          | Active                                                       | 0.65                                                             | 0.20   | 2.13   | 0.48    | 0.62                                                               | 0.19   | 1.97   | 0.41    |
| Marital status: Currently married                            | Marital status: Not currently married                        | 0.72                                                             | 0.37   | 1.42   | 0.35    | 0.69                                                               | 0.35   | 1.34   | 0.27    |
| Alcohol consumption: More than 4 alcoholic drinks in a month | Alcohol consumption: Less than 4 alcoholic drinks in a month | 0.95                                                             | 0.53   | 1.71   | 0.86    | 0.95                                                               | 0.51   | 1.75   | 0.86    |
| FEV1/FVC<0.7                                                 |                                                              | 0.61                                                             | 0.29   | 1.25   | 0.18    | 0.60                                                               | 0.30   | 1.20   | 0.15    |
| Charlson's comorbidity index score                           |                                                              | 1.28                                                             | 0.67   | 2.47   | 0.45    | 1.17                                                               | 0.63   | 2.16   | 0.62    |
| Parameter                                                    | Reference                                                    | <i>Hypertension cause-specific hazard</i>                        |        |        |         | <i>Hypertension sub-distribution hazard</i>                        |        |        |         |
|                                                              |                                                              | Hazard ratio                                                     | 95% CI |        | P-value | Hazard ratio                                                       | 95% CI |        | P-value |
| Age: 35-44 years                                             | Age: 25-34 years                                             | 1.50                                                             | 1.08   | 2.08   | 0.01    | 1.50                                                               | 1.09   | 2.07   | 0.01    |
| Age: 45-54 years                                             |                                                              | 1.72                                                             | 1.23   | 2.39   | <0.01   | 1.72                                                               | 1.24   | 2.38   | <0.01   |
| Age: 55-64 years                                             |                                                              | 1.73                                                             | 1.18   | 2.53   | <0.01   | 1.68                                                               | 1.14   | 2.47   | <0.01   |
| Age: 65-74 years                                             |                                                              | 1.76                                                             | 1.12   | 2.75   | 0.01    | 1.67                                                               | 1.06   | 2.61   | 0.03    |
| Body Mass Index (kg/m <sup>2</sup> )                         |                                                              | 1.20                                                             | 1.05   | 1.37   | <0.01   | 1.21                                                               | 1.07   | 1.38   | <0.01   |
| (Body Mass Index) <sup>2</sup>                               |                                                              | 1.00                                                             | 1.00   | 1.00   | 0.15    | 1.00                                                               | 1.00   | 1.00   | 0.08    |
| Forced Expiratory Volume in 1 second (FEV1)(liter)           |                                                              | 0.87                                                             | 0.72   | 1.06   | 0.16    | 0.91                                                               | 0.76   | 1.10   | 0.33    |
| Sex: Female                                                  | Male                                                         | 1.03                                                             | 0.77   | 1.36   | 0.85    | 1.09                                                               | 0.82   | 1.44   | 0.54    |
| Race: White                                                  | Race: Black                                                  | 0.82                                                             | 0.58   | 1.15   | 0.24    | 0.78                                                               | 0.54   | 1.11   | 0.17    |
| Education: less than high school                             | Education: at least high school                              | 1.06                                                             | 0.81   | 1.39   | 0.68    | 1.03                                                               | 0.78   | 1.37   | 0.83    |
| Smoking status: Ever Smoker                                  | Smoking status: Never smoker                                 | 1.07                                                             | 0.86   | 1.33   | 0.56    | 1.07                                                               | 0.86   | 1.34   | 0.55    |
| Physically Inactive                                          | Active                                                       | 1.11                                                             | 0.77   | 1.59   | 0.57    | 1.11                                                               | 0.77   | 1.61   | 0.56    |
| Marital status: Currently married                            | Marital status: Not currently married                        | 1.09                                                             | 0.83   | 1.43   | 0.53    | 1.07                                                               | 0.82   | 1.41   | 0.61    |
| Alcohol consumption: More than 4 alcoholic drinks in a month | Alcohol consumption: Less than 4 alcoholic drinks in a month | 1.05                                                             | 0.84   | 1.32   | 0.68    | 1.05                                                               | 0.84   | 1.32   | 0.66    |
| FEV1/FVC<0.7                                                 |                                                              | 1.04                                                             | 0.77   | 1.41   | 0.81    | 1.02                                                               | 0.75   | 1.39   | 0.89    |
| Charlson's comorbidity index score                           |                                                              | 1.49                                                             | 1.22   | 1.83   | <0.01   | 1.37                                                               | 1.12   | 1.69   | <0.01   |

**Table B.1 continued.** Results of cause-specific and Fine-Gray sub-distribution hazard models representing hazard ratio of the event of interest for every liter increase in absolute forced expiratory volume in 1 second.

| Parameter                                                    | Reference                                                    | <i>All-cause mortality cause-specific hazard</i> |        |       |         | <i>All-cause mortality sub-distribution hazard</i> |        |       |         |
|--------------------------------------------------------------|--------------------------------------------------------------|--------------------------------------------------|--------|-------|---------|----------------------------------------------------|--------|-------|---------|
|                                                              |                                                              | Hazard ratio                                     | 95% CI |       | P-value | Hazard ratio                                       | 95% CI |       | P-value |
| Age: 35-44 years                                             | Age: 25-34 years                                             | 1.21                                             | 0.53   | 2.79  | 0.65    | 1.19                                               | 0.52   | 2.74  | 0.68    |
| Age: 45-54 years                                             |                                                              | 1.34                                             | 0.61   | 2.97  | 0.47    | 1.33                                               | 0.61   | 2.89  | 0.47    |
| Age: 55-64 years                                             |                                                              | 2.52                                             | 1.16   | 5.46  | 0.02    | 2.48                                               | 1.19   | 5.17  | 0.02    |
| Age: 65-74 years                                             |                                                              | 6.18                                             | 2.77   | 13.81 | <0.01   | 6.09                                               | 2.85   | 13.01 | <0.01   |
| Body Mass Index (kg/m <sup>2</sup> )                         |                                                              | 0.80                                             | 0.64   | 0.99  | 0.04    | 0.80                                               | 0.61   | 1.05  | 0.11    |
| (Body Mass Index) <sup>2</sup>                               |                                                              | 1.01                                             | 1.00   | 1.01  | 0.02    | 1.00                                               | 1.00   | 1.01  | 0.08    |
| Forced Expiratory Volume in 1 second (FEV1)(liter)           |                                                              | 0.59                                             | 0.43   | 0.81  | <0.01   | 0.63                                               | 0.46   | 0.85  | <0.01   |
| Sex: Female                                                  | Male                                                         | 0.35                                             | 0.22   | 0.58  | <0.01   | 0.38                                               | 0.24   | 0.59  | <0.01   |
| Race: White                                                  | Race: Black                                                  | 2.79                                             | 1.14   | 6.84  | 0.03    | 2.62                                               | 1.14   | 6.04  | 0.02    |
| Education: less than high school                             | Education: at least high school                              | 1.18                                             | 0.78   | 1.78  | 0.45    | 1.19                                               | 0.78   | 1.80  | 0.42    |
| Smoking status: Ever Smoker                                  | Smoking status: Never smoker                                 | 0.75                                             | 0.49   | 1.15  | 0.19    | 0.75                                               | 0.50   | 1.14  | 0.18    |
| Physically Inactive                                          | Active                                                       | 1.35                                             | 0.75   | 2.42  | 0.32    | 1.28                                               | 0.73   | 2.26  | 0.40    |
| Marital status: Currently married                            | Marital status: Not currently married                        | 0.90                                             | 0.57   | 1.41  | 0.64    | 0.87                                               | 0.54   | 1.40  | 0.57    |
| Alcohol consumption: More than 4 alcoholic drinks in a month | Alcohol consumption: Less than 4 alcoholic drinks in a month | 1.33                                             | 0.90   | 1.96  | 0.15    | 1.35                                               | 0.91   | 2.01  | 0.13    |
| FEV1/FVC<0.7                                                 |                                                              | 1.30                                             | 0.81   | 2.08  | 0.27    | 1.30                                               | 0.79   | 2.14  | 0.30    |
| Charlson's comorbidity index score                           |                                                              | 1.65                                             | 1.23   | 2.21  | 0.01    | 1.54                                               | 1.10   | 2.16  | 0.01    |
